# Supplementary material for: Emotion Regulation Difficulties mediate the Relationship between Childhood Maltreatment and Perceived Stress in Adulthood
Source: Research Square preprint supplement (doi:10.21203/rs.3.rs-7454105/v1), 2025-10-28
Supplement: Supplementary file 1 [file 83d04cf2c1d84a3965863996.docx]

| Path | b | SE | pval | CI |
| --- | --- | --- | --- | --- |
| Effect of sex on CTQ_Emo_Abuse | -2.18*** | 0.45 | 0.00 | [-3.06, -1.31] |
| Effect of sex on CTQ_Physical_Abuse | -0.17 | 0.17 | 0.31 | [-0.51, 0.16] |
| Effect of sex on CTQ_Sex_Abuse | -0.68** | 0.22 | 0.00 | [-1.11, -0.25] |
| Effect of sex on CTQ_Emo_Neglect | -0.3 | 0.47 | 0.52 | [-1.23, 0.62] |
| Effect of sex on CTQ_Physical_Neglect | -0.44* | 0.22 | 0.04 | [-0.87, -0.01] |
| Effect of CTQ_Emo_Abuse on DERS_tot | 0.76 | 0.42 | 0.07 | [-0.07, 1.58] |
| Effect of CTQ_Physical_Abuse on DERS_tot | 0.31 | 0.76 | 0.68 | [-1.18, 1.80] |
| Effect of CTQ_Sex_Abuse on DERS_tot | 0.19 | 0.6 | 0.76 | [-1.00, 1.37] |
| Effect of CTQ_Emo_Neglect on DERS_tot | 1.80*** | 0.44 | 0.00 | [0.93, 2.66] |
| Effect of CTQ_Physical_Neglect on DERS_tot | 0.11 | 0.7 | 0.88 | [-1.27, 1.49] |
| Effect of age on DERS_tot | -1.08** | 0.36 | 0.00 | [-1.79, -0.38] |
| Effect of sex on DERS_tot | -3.73 | 3.17 | 0.24 | [-9.94, 2.48] |
| Effect of CTQ_Emo_Abuse on PSS_tot | 0.25** | 0.09 | 0.00 | [0.08, 0.42] |
| Effect of CTQ_Physical_Abuse on PSS_tot | 0.03 | 0.21 | 0.87 | [-0.37, 0.44] |
| Effect of CTQ_Sex_Abuse on PSS_tot | 0.26* | 0.11 | 0.01 | [0.05, 0.47] |
| Effect of CTQ_Emo_Neglect on PSS_tot | -0.08 | 0.11 | 0.44 | [-0.29, 0.13] |
| Effect of CTQ_Physical_Neglect on PSS_tot | -0.04 | 0.17 | 0.8 | [-0.37, 0.28] |
| Effect of DERS_tot on PSS_tot | 0.16*** | 0.01 | 0.00 | [0.14, 0.18] |
| Effect of age on PSS_tot | 0.00 | 0.08 | 0.96 | [-0.17, 0.16] |
| Effect of sex on PSS_tot | -0.16 | 0.73 | 0.83 | [-1.58, 1.27] |
| Covariance of CTQ_Emo_Abuse with CTQ_Physical_Abuse | 3.45*** | 0.73 | 0.00 | [2.02, 4.87] |
| Covariance of CTQ_Emo_Abuse with CTQ_Sex_Abuse | 3.12*** | 0.88 | 0.00 | [1.40, 4.84] |
| Covariance of CTQ_Emo_Abuse with CTQ_Emo_Neglect | 13.16*** | 1.26 | 0.00 | [10.68, 15.63] |
| Covariance of CTQ_Emo_Abuse with CTQ_Physical_Neglect | 4.95*** | 0.74 | 0.00 | [3.51, 6.40] |
| Covariance of CTQ_Physical_Abuse with CTQ_Sex_Abuse | 0.47 | 0.31 | 0.13 | [-0.15, 1.08] |
| Covariance of CTQ_Physical_Abuse with CTQ_Emo_Neglect | 2.45*** | 0.58 | 0.00 | [1.33, 3.58] |
| Covariance of CTQ_Physical_Abuse with CTQ_Physical_Neglect | 1.14*** | 0.31 | 0.00 | [0.53, 1.75] |
| Covariance of CTQ_Sex_Abuse with CTQ_Emo_Neglect | 2.68** | 0.89 | 0.00 | [0.94, 4.42] |
| Covariance of CTQ_Sex_Abuse with CTQ_Physical_Neglect | 1.07** | 0.38 | 0.00 | [0.33, 1.80] |
| Covariance of CTQ_Emo_Neglect with CTQ_Physical_Neglect | 5.30*** | 0.65 | 0.00 | [4.02, 6.58] |
| Variance of CTQ_Emo_Abuse | 19.66*** | 1.7 | 0.00 | [16.32, 22.99] |
| Variance of CTQ_Physical_Abuse | 2.58*** | 0.59 | 0.00 | [1.43, 3.74] |
| Variance of CTQ_Sex_Abuse | 5.53*** | 1.34 | 0.00 | [2.90, 8.15] |
| Variance of CTQ_Emo_Neglect | 17.58*** | 1.29 | 0.00 | [15.06, 20.11] |
| Variance of CTQ_Physical_Neglect | 4.58*** | 0.48 | 0.00 | [3.64, 5.52] |
| Variance of DERS_tot | 560.17*** | 36.72 | 0.00 | [488.21, 632.13] |
| Variance of PSS_tot | 29.13*** | 2.07 | 0.00 | [25.08, 33.18] |
| Indirect effect of CTQ_Emo_Abuse on PSS_tot (via DERS_tot) | 0.12 | 0.07 | 0.07 | [-0.01, 0.26] |
| Indirect effect of CTQ_Physical_Abuse on PSS_tot (via DERS_tot) | 0.05 | 0.12 | 0.68 | [-0.19, 0.29] |
| Indirect effect of CTQ_Sex_Abuse on PSS_tot (via DERS_tot) | 0.03 | 0.1 | 0.76 | [-0.16, 0.22] |
| Indirect effect of CTQ_Emo_Neglect on PSS_tot (via DERS_tot) | 0.29*** | 0.07 | 0.00 | [0.14, 0.43] |
| Indirect effect of CTQ_Physical_Neglect on PSS_tot (via DERS_tot) | 0.02 | 0.11 | 0.88 | [-0.20, 0.24] |
| Total effect of CTQ_Emo_Abuse on PSS_tot | 0.37*** | 0.11 | 0.00 | [0.17, 0.58] |
| Total effect of CTQ_Physical_Abuse on PSS_tot | 0.08 | 0.23 | 0.72 | [-0.37, 0.54] |
| Total effect of CTQ_Sex_Abuse on PSS_tot | 0.29* | 0.12 | 0.01 | [0.06, 0.52] |
| Total effect of CTQ_Emo_Neglect on PSS_tot | 0.21 | 0.13 | 0.11 | [-0.05, 0.46] |
| Total effect of CTQ_Physical_Neglect on PSS_tot | -0.02 | 0.2 | 0.91 | [-0.42, 0.37] |

Table S1. Parameter estimates for Model 1. Unstandardized coefficients (b) are presented with standard errors (SE), p values, and 95% confidence intervals (CI). Significant paths are marked with * p < .05, ** p < .01, and *** p < .001. The table includes regression paths, covariances, variances, indirect effects, and total effects.

| Path | b | SE | pval | CI |
| --- | --- | --- | --- | --- |
| Effect of sex on CTQ_Emo_Abuse | -2.18*** | 0.45 | 0.00 | [-3.06, -1.31] |
| Effect of sex on CTQ_Emo_Neglect | -0.3 | 0.47 | 0.52 | [-1.23, 0.62] |
| Effect of sex on CTQ_Sex_Abuse | -0.68** | 0.22 | 0.00 | [-1.11, -0.25] |
| Effect of CTQ_Emo_Abuse on DERS_NonAccept | 0.12 | 0.1 | 0.21 | [-0.07, 0.32] |
| Effect of CTQ_Emo_Neglect on DERS_NonAccept | 0.29** | 0.1 | 0.00 | [0.09, 0.49] |
| Effect of CTQ_Sex_Abuse on DERS_NonAccept | 0.05 | 0.15 | 0.72 | [-0.23, 0.34] |
| Effect of sex on DERS_NonAccept | -1.71* | 0.74 | 0.02 | [-3.16, -0.26] |
| Effect of age on DERS_NonAccept | -0.07 | 0.08 | 0.43 | [-0.23, 0.10] |
| Effect of CTQ_Emo_Abuse on DERS_Goal | 0.16* | 0.08 | 0.04 | [0.01, 0.32] |
| Effect of CTQ_Emo_Neglect on DERS_Goal | 0.17 | 0.09 | 0.06 | [-0.00, 0.35] |
| Effect of CTQ_Sex_Abuse on DERS_Goal | 0.19 | 0.1 | 0.07 | [-0.01, 0.39] |
| Effect of sex on DERS_Goal | -0.63 | 0.65 | 0.33 | [-1.90, 0.64] |
| Effect of age on DERS_Goal | -0.08 | 0.07 | 0.26 | [-0.21, 0.06] |
| Effect of CTQ_Emo_Abuse on DERS_Imp | 0.21* | 0.1 | 0.04 | [0.01, 0.42] |
| Effect of CTQ_Emo_Neglect on DERS_Imp | 0.23* | 0.11 | 0.03 | [0.02, 0.44] |
| Effect of CTQ_Sex_Abuse on DERS_Imp | 0.15 | 0.14 | 0.28 | [-0.12, 0.42] |
| Effect of sex on DERS_Imp | -1.21 | 0.65 | 0.06 | [-2.47, 0.06] |
| Effect of age on DERS_Imp | -0.18* | 0.08 | 0.02 | [-0.33, -0.03] |
| Effect of CTQ_Emo_Abuse on DERS_Emo_Awa | -0.1 | 0.08 | 0.23 | [-0.26, 0.06] |
| Effect of CTQ_Emo_Neglect on DERS_Emo_Awa | 0.43*** | 0.08 | 0.00 | [0.27, 0.59] |
| Effect of CTQ_Sex_Abuse on DERS_Emo_Awa | -0.12 | 0.09 | 0.19 | [-0.30, 0.06] |
| Effect of sex on DERS_Emo_Awa | 0.79 | 0.59 | 0.18 | [-0.36, 1.94] |
| Effect of age on DERS_Emo_Awa | -0.16* | 0.06 | 0.01 | [-0.28, -0.04] |
| Effect of CTQ_Emo_Abuse on DERS_Diff_ER | 0.34** | 0.11 | 0.00 | [0.13, 0.55] |
| Effect of CTQ_Emo_Neglect on DERS_Diff_ER | 0.45*** | 0.12 | 0.00 | [0.22, 0.69] |
| Effect of CTQ_Sex_Abuse on DERS_Diff_ER | -0.07 | 0.16 | 0.67 | [-0.38, 0.25] |
| Effect of sex on DERS_Diff_ER | -1.5 | 0.93 | 0.11 | [-3.31, 0.32] |
| Effect of age on DERS_Diff_ER | -0.21* | 0.1 | 0.04 | [-0.41, -0.01] |
| Effect of CTQ_Emo_Abuse on DERS_Clarity | 0.08 | 0.08 | 0.31 | [-0.07, 0.24] |
| Effect of CTQ_Emo_Neglect on DERS_Clarity | 0.24** | 0.08 | 0.00 | [0.09, 0.40] |
| Effect of CTQ_Sex_Abuse on DERS_Clarity | -0.02 | 0.12 | 0.88 | [-0.26, 0.22] |
| Effect of sex on DERS_Clarity | 0.53 | 0.6 | 0.38 | [-0.66, 1.71] |
| Effect of age on DERS_Clarity | -0.36*** | 0.06 | 0.00 | [-0.48, -0.24] |
| Effect of DERS_NonAccept on PSS_Helplessness | 0.00 | 0.05 | 0.94 | [-0.09, 0.10] |
| Effect of DERS_Goal on PSS_Helplessness | 0.14* | 0.07 | 0.04 | [0.00, 0.28] |
| Effect of DERS_Imp on PSS_Helplessness | 0.05 | 0.05 | 0.36 | [-0.06, 0.16] |
| Effect of DERS_Emo_Awa on PSS_Helplessness | -0.08 | 0.06 | 0.2 | [-0.19, 0.04] |
| Effect of DERS_Diff_ER on PSS_Helplessness | 0.26*** | 0.05 | 0.00 | [0.15, 0.37] |
| Effect of DERS_Clarity on PSS_Helplessness | 0.12 | 0.06 | 0.07 | [-0.01, 0.24] |
| Effect of CTQ_Emo_Abuse on PSS_Helplessness | 0.14* | 0.06 | 0.02 | [0.03, 0.26] |
| Effect of CTQ_Emo_Neglect on PSS_Helplessness | -0.06 | 0.07 | 0.35 | [-0.19, 0.07] |
| Effect of CTQ_Sex_Abuse on PSS_Helplessness | 0.18* | 0.08 | 0.02 | [0.03, 0.33] |
| Effect of sex on PSS_Helplessness | -0.05 | 0.48 | 0.92 | [-1.00, 0.90] |
| Effect of age on PSS_Helplessness | 0.03 | 0.05 | 0.62 | [-0.08, 0.13] |
| Effect of DERS_NonAccept on PSS_Self_Efficacy | 0.04 | 0.03 | 0.11 | [-0.01, 0.09] |
| Effect of DERS_Goal on PSS_Self_Efficacy | -0.07* | 0.04 | 0.04 | [-0.14, -0.00] |
| Effect of DERS_Imp on PSS_Self_Efficacy | 0.02 | 0.03 | 0.51 | [-0.04, 0.08] |
| Effect of DERS_Emo_Awa on PSS_Self_Efficacy | -0.06* | 0.03 | 0.05 | [-0.12, -0.00] |
| Effect of DERS_Diff_ER on PSS_Self_Efficacy | -0.18*** | 0.03 | 0 | [-0.23, -0.12] |
| Effect of DERS_Clarity on PSS_Self_Efficacy | -0.04 | 0.03 | 0.16 | [-0.10, 0.02] |
| Effect of CTQ_Emo_Abuse on PSS_Self_Efficacy | -0.05 | 0.03 | 0.19 | [-0.11, 0.02] |
| Effect of CTQ_Emo_Neglect on PSS_Self_Efficacy | 0.00 | 0.04 | 0.97 | [-0.09, 0.08] |
| Effect of CTQ_Sex_Abuse on PSS_Self_Efficacy | -0.09 | 0.05 | 0.06 | [-0.19, 0.00] |
| Effect of sex on PSS_Self_Efficacy | 0.01 | 0.29 | 0.97 | [-0.55, 0.58] |
| Effect of age on PSS_Self_Efficacy | 0.04 | 0.03 | 0.23 | [-0.02, 0.10] |
| Covariance of CTQ_Emo_Abuse with CTQ_Emo_Neglect | 13.16*** | 1.26 | 0.00 | [10.68, 15.63] |
| Covariance of CTQ_Emo_Abuse with CTQ_Sex_Abuse | 3.12*** | 0.88 | 0.00 | [1.40, 4.84] |
| Covariance of CTQ_Emo_Neglect with CTQ_Sex_Abuse | 2.68** | 0.89 | 0.00 | [0.94, 4.42] |
| Covariance of DERS_NonAccept with DERS_Goal | 10.88*** | 1.5 | 0.00 | [7.93, 13.83] |
| Covariance of DERS_NonAccept with DERS_Imp | 12.82*** | 1.65 | 0.00 | [9.59, 16.06] |
| Covariance of DERS_NonAccept with DERS_Emo_Awa | 10.53*** | 1.42 | 0.00 | [7.75, 13.32] |
| Covariance of DERS_NonAccept with DERS_Diff_ER | 26.73*** | 2.2 | 0.00 | [22.43, 31.04] |
| Covariance of DERS_NonAccept with DERS_Clarity | 11.55*** | 1.41 | 0.00 | [8.78, 14.32] |
| Covariance of DERS_Goal with DERS_Imp | 13.85*** | 1.38 | 0.00 | [11.15, 16.55] |
| Covariance of DERS_Goal with DERS_Emo_Awa | 3.82** | 1.2 | 0.00 | [1.47, 6.18] |
| Covariance of DERS_Goal with DERS_Diff_ER | 22.58*** | 1.81 | 0.00 | [19.03, 26.13] |
| Covariance of DERS_Goal with DERS_Clarity | 6.61*** | 1.19 | 0.00 | [4.28, 8.94] |
| Covariance of DERS_Imp with DERS_Emo_Awa | 6.28*** | 1.25 | 0.00 | [3.83, 8.73] |
| Covariance of DERS_Imp with DERS_Diff_ER | 21.58*** | 2.03 | 0.00 | [17.60, 25.56] |
| Covariance of DERS_Imp with DERS_Clarity | 10.65*** | 1.35 | 0.00 | [8.00, 13.29] |
| Covariance of DERS_Emo_Awa with DERS_Diff_ER | 11.33*** | 1.65 | 0.00 | [8.09, 14.57] |
| Covariance of DERS_Emo_Awa with DERS_Clarity | 11.01*** | 1.1 | 0.00 | [8.85, 13.18] |
| Covariance of DERS_Diff_ER with DERS_Clarity | 13.86*** | 1.82 | 0.00 | [10.29, 17.43] |
| Covariance of PSS_Helplessness with PSS_Self_Efficacy | -4.25*** | 0.47 | 0.00 | [-5.18, -3.32] |
| Variance of CTQ_Emo_Abuse | 19.66*** | 1.7 | 0.00 | [16.32, 22.99] |
| Variance of CTQ_Emo_Neglect | 17.58*** | 1.29 | 0.00 | [15.06, 20.11] |
| Variance of CTQ_Sex_Abuse | 5.53*** | 1.34 | 0.00 | [2.90, 8.15] |
| Variance of DERS_NonAccept | 33.94*** | 1.92 | 0.00 | [30.19, 37.70] |
| Variance of DERS_Goal | 22.68*** | 1.36 | 0.00 | [20.01, 25.35] |
| Variance of DERS_Imp | 26.71*** | 1.91 | 0.00 | [22.97, 30.44] |
| Variance of DERS_Emo_Awa | 19.16*** | 1.43 | 0.00 | [16.36, 21.96] |
| Variance of DERS_Diff_ER | 49.89*** | 3.14 | 0.00 | [43.73, 56.05] |
| Variance of DERS_Clarity | 19.83*** | 1.26 | 0.00 | [17.36, 22.31] |
| Variance of PSS_Helplessness | 13.89*** | 1.05 | 0.00 | [11.83, 15.94] |
| Variance of PSS_Self_Efficacy | 4.24*** | 0.33 | 0.00 | [3.59, 4.89] |
| Indirect effect of CTQ_Emo_Abuse on PSS_Helplessness (via DERS) | 0.14** | 0.05 | 0.00 | [0.05, 0.23] |
| Indirect effect of CTQ_Emo_Neglect on PSS_Helplessness (via DERS) | 0.15** | 0.05 | 0.00 | [0.05, 0.25] |
| Indirect effect of CTQ_Sex_Abuse on PSS_Helplessness (via DERS) | 0.02 | 0.07 | 0.72 | [-0.11, 0.15] |
| Indirect effect of CTQ_Emo_Abuse on PSS_Self_Efficacy (via DERS) | -0.06* | 0.02 | 0.01 | [-0.11, -0.01] |
| Indirect effect of CTQ_Emo_Neglect on PSS_Self_Efficacy (via DERS) | -0.11*** | 0.03 | 0.00 | [-0.17, -0.06] |
| Indirect effect of CTQ_Sex_Abuse on PSS_Self_Efficacy (via DERS) | 0.01 | 0.04 | 0.74 | [-0.06, 0.08] |
| Total effect of CTQ_Emo_Abuse on PSS_Helplessness | 0.28*** | 0.07 | 0.00 | [0.14, 0.42] |
| Total effect of CTQ_Emo_Neglect on PSS_Helplessness | 0.09 | 0.09 | 0.31 | [-0.08, 0.26] |
| Total effect of CTQ_Sex_Abuse on PSS_Helplessness | 0.21** | 0.08 | 0.01 | [0.05, 0.36] |
| Total effect of CTQ_Emo_Abuse on PSS_Self_Efficacy | -0.10** | 0.04 | 0.01 | [-0.18, -0.03] |
| Total effect of CTQ_Emo_Neglect on PSS_Self_Efficacy | -0.12* | 0.05 | 0.01 | [-0.21, -0.02] |
| Total effect of CTQ_Sex_Abuse on PSS_Self_Efficacy | -0.08 | 0.05 | 0.14 | [-0.18, 0.03] |

Table S2. Parameter estimates for Model 2. Unstandardized coefficients (b) are presented with standard errors (SE), p values, and 95% confidence intervals (CI). Significant paths are marked with * p < .05, ** p < .01, and *** p < .001. The table includes regression paths, covariances, variances, indirect effects, and total effects.
